# Supplementary material
Source: PubMed Central journal article supplement (PMC1560036)
Supplement: rspb20053287s04.pdf [file rspb20053287s04.pdf]

Appendix. Model selection to analyze the relationship between transformed prey fecundity and explicative variables: prey density ( $P_y$ ), predator density ( $P_d$ ), the ratio between predators and prey ( $P_y/P_d$ ) and colony ( $c$ ). The deviance (DEV), the number of parameters (np), the AICc, the  $\Delta$ AICc (difference between the AICc of each model and the AICc of the best model) and the AICc Weight of each model were also shown. The AIC Weight was calculated as:  $\exp(-0.5 * \Delta\text{AICc}) * [\text{sum for all models of } \exp(-0.5 * \Delta\text{AICc})]^{-1}$  (Williams et al. 2001). All the models (except the null model) also included the year as a random effect. Numbers in brackets are the model numbers used in the text. The selected model is shown in bold.

| Model                                                   | Biological hypothesis                                                                                                            | DEV          | np       | AICc         | $\Delta$ AICc | AICc Weight |
|---------------------------------------------------------|----------------------------------------------------------------------------------------------------------------------------------|--------------|----------|--------------|---------------|-------------|
| Null                                                    |                                                                                                                                  | 73.50        |          |              |               |             |
| <b>(1) <math>\log(P_y) + \log(P_d) + P_y/P_d</math></b> | Fecundity varied non-linearly with prey density, predator density and the prey/predator ratio                                    | <b>37.95</b> | <b>6</b> | <b>49.95</b> | <b>0</b>      | <b>0.54</b> |
| (2) $\log(P_y) + \log(P_d) + P_y/P_d + c$               | Fecundity varied non-linearly with prey density, predator density and the prey/predator ratio with an additive effect of colony  | 33.06        | 9        | 51.06        | 1.11          | 0.31        |
| (3) $\log(P_y) + \log(P_d)$                             | Fecundity varied non-linearly with prey and predator densities                                                                   | 42.48        | 5        | 52.48        | 2.52          | 0.15        |
| (4) $\log(P_y) + P_y/P_d$                               | Fecundity varied non-linearly with prey density and prey/predator ratio                                                          | 60.97        | 5        | 70.97        | 21.02         | 0.00        |
| (5) $P_y + P_d + P_y/P_d + c$                           | Fecundity varied linearly with prey density, predator density and the prey/predator ratio with an additive effect of colony      | 54.84        | 9        | 72.84        | 22.89         | 0.00        |
| (6) $P_y + P_d + P_y/P_d$                               | Fecundity varied linearly with prey and predator densities and the prey/predator ratio                                           | 61.06        | 6        | 73.06        | 23.11         | 0.00        |
| (7) $P_d + P_y/P_d$                                     | Fecundity varied linearly with predator density and prey/predator ratio                                                          | 63.68        | 5        | 73.68        | 23.72         | 0.00        |
| (8) $P_y^2 + \log(P_d) + P_y/P_d$                       | Quadratic fit of prey density, logarithmic fit of predator density and the prey/predator ratio                                   | 63.88        | 5        | 73.88        | 23.93         | 0.00        |
| (9) $P_y^2 + \log(P_d) + P_y/P_d + c$                   | Quadratic fit of prey density, logarithmic fit of predator density and the prey/predator ratio with an additive effect of colony | 56.71        | 9        | 74.71        | 24.75         | 0.00        |
| (10) $\log(P_d) + P_y/P_d$                              | Fecundity varied non-linearly with predator density and the prey/predator ratio                                                  | 65.85        | 5        | 75.85        | 25.90         | 0.00        |
| (11) $P_y + P_y/P_d$                                    | Fecundity varied linearly with prey density and the prey/predator ratio                                                          | 65.89        | 5        | 75.89        | 25.93         | 0.00        |
| (12) $P_y + P_d$                                        | Fecundity varied linearly with prey density and predator density                                                                 | 72.50        | 5        | 82.50        | 32.55         | 0.00        |
| (13) $P_y^2 + P_d^2$                                    | Quadratic fit of prey and predator densities with prey fecundity                                                                 | 74.97        | 5        | 84.97        | 35.01         | 0.00        |
| (14) $P_d^2$                                            | Quadratic fit of predator density with prey fecundity                                                                            | 77.88        | 4        | 85.88        | 35.92         | 0.00        |
| (15) $P_d$                                              | Fecundity varied linearly only with predator density                                                                             | 78.67        | 4        | 86.67        | 36.72         | 0.00        |
| (16) $\log(P_d)$                                        | Logarithmic fit of predator density with fecundity                                                                               | 80.31        | 4        | 88.31        | 38.35         | 0.00        |
| (17) $P_y * c$                                          | Fecundity varied linearly with prey density differently for each colony                                                          | 76.56        | 6        | 88.56        | 38.60         | 0.00        |
| (18) $P_y$                                              | Fecundity varied linearly only with prey density                                                                                 | 82.81        | 4        | 90.81        | 40.85         | 0.00        |
| (19) $P_y^2$                                            | Quadratic fit of prey density with prey fecundity                                                                                | 84.98        | 4        | 92.98        | 43.03         | 0.00        |
